# Supplementary material for: Analysing the Initial Bacterial Adhesion to Evaluate the Performance of Antifouling Surfaces
Source: PubMed Central journal article supplement (PMC7400106; doi:10.3390/antibiotics9070421), 2020-07-17
Supplement: antibiotics-09-00421-s001.pdf [file antibiotics-09-00421-s001.pdf]

## Supplementary Material

Patrícia Alves <sup>1</sup>, Joana Maria Moreira <sup>1</sup>, João Mário Miranda <sup>2,\*</sup> and Filipe José Mergulhão <sup>1,\*</sup>

<sup>1</sup> LEPABE - Laboratory for Process Engineering, Environment, Biotechnology and Energy, Faculty of Engineering, University of Porto, 4200-465 Porto, Portugal; up201510029@fe.up.pt (P.A.); joanarm@fe.up.pt (Joana.M.M.); filipem@fe.up.pt (F.J.M.)

<sup>2</sup> CEFT – Transport Phenomena Research Center, Faculty of Engineering, University of Porto, 4200-465 Porto, Portugal; jmiranda@fe.up.pt

\* Correspondence: jmiranda@fe.up.pt (João.M.M.); filipem@fe.up.pt (F.J.M.); Tel.: (+351) 220414847 (João.M.M.); (+351) 225081668 (F.J.M.)

Received: 8 June 2020; Accepted: 15 July 2020; Published: date

### Image processing and extraction of cell coordinates

After each 30 min trial, 5 images were taken in different regions of the surface to obtain a large set of adhered cells. Using ImageJ, the images were inverted, and the maxima detected (Figure S1). Each maximum corresponds to a cell. The respective coordinates were obtained and a pair correlation map was constructed [1]. Results were presented in the form of a 2D density probability function. The probability density function was calculated using two R language scripts. The file with the cell coordinates (input file) and the R language scripts are presented in the following sections.

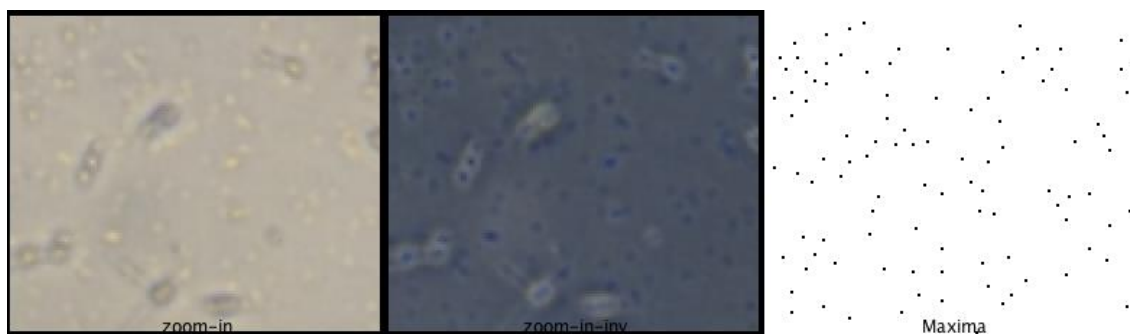

**Figure S1.** Steps of the method. From left to right: initial image, inverted image and maxima.

### Input files

The input file for the R scripts that generate the 2D correlations maps has the following format (only the first 6 lines of the file are shown):

```
-----  
      X      Y  
1     389    71  
2     561   533  
3    1191   539  
4     417    63  
5    1017   461  
-----
```

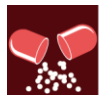

## R scripts

Two R language scripts were used to generate 2D correlations plot, a script that calculates the relative position in relation to the reference cell from the coordinates of the cells and a script that generates the histogram.

### Relative positions script

```
library(plotrix)

rm(list=ls(all=TRUE))

# base path
dir0="/Users/jmiranda/Desktop/results/"
# coordinate files are here
dirSub="t/"

# relative coordinates directory (output of this script will be
saved here)
dir_res_sub="t-res/"
dir_res=paste(dir0,dir_res_sub,sep="")

dir=paste(dir0,dirSub,sep="")
text_t=character()

ficheiros_nome=list.files(dir,pattern="*.txt",full.names =
FALSE)
ficheiro=paste(dir,ficheiros_nome[1],sep="/")

# cut off radius in pixels
radius=50.0
dados=read.table(ficheiro,header=TRUE,blank.lines.skip=FALSE)

for (temp in ficheiros_nome)
{
# processes all available files

aux=numeric()
aux2=numeric()
xx=numeric()
yy=numeric()

ficheiro=paste(dir,temp,sep="/")

dados=read.table(ficheiro,header=TRUE,blank.lines.skip=FALSE)

ficheiro_base=strsplit(temp,"\\.")[[1]]
ficheiro_res0=paste(ficheiro_base[1],"res",sep="_")
ficheiro_res0=paste(ficheiro_res0,"txt",sep=".")
ficheiro_res=paste(dir_res,ficheiro_res0,sep="")

xx=dados$X
yy=dados$Y

n=length(yy)

xmax=max(xx)
ymax=max(yy)

for(i in (1:n))
{
if(xx[i]>radius & yy[i]>radius & xx[i]<(xmax-radius) &
yy[i]<(ymax-radius))
```

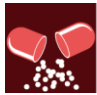

```
{
  for(j in (1:n))
  {
    if(j!=i)
    {

      xp0=xx[i]
      yp0=yy[i]
      xp=xx[j]
      yp=yy[j]

      dist=sqrt((xp-xp0)^2+(yp-yp0)^2)

      if(dist<radius )
      {
        aux=c(aux, xp-xp0)
        aux2=c(aux2, yp-yp0)
      }
    }
  }
}

x <- data.frame(a = aux, b = aux2)
write.table(x, file = ficheiro_res, sep = ",", col.names = NA,
           qmethod = "double")
}
```

## Histogram script

```
library(plotrix)

library(MASS)

require(grDevices) # for colours

rm(list=ls(all=TRUE))

# base path
dir0="/Users/jmiranda/Desktop/results/"
# directory with the coordinates files

dirSub="t-res/"

# full path

dir=paste(dir0,dirSub,sep="")

ficheiros_nome=list.files(dir,pattern="*.txt",full.names =
FALSE)

temp=ficheiros_nome[1]

count=numeric()
```



```
for (temp in ficheiros_nome)
  {

    dir2=paste(dir0,"t-tif/",sep="")
    nome=paste(dir2,temp,sep="")
    nome=paste(nome,".tiff",sep="")

    tiff(filename = nome, , res = 300, width = 1600, height
= 1600)

    ficheiro=paste(dir,temp,sep="/")

    dados=read.table(ficheiro,sep=",",header=FALSE,blank.lines.sk
ip=FALSE,skip=1)

#      0.61 is the conversion factor from pixels to micrometers
x=dados$V2*0.61
y=-dados$V3*0.61

#      maximum and minimum values
valmax=4e-4
valmin=0

    df <- data.frame(x,y)

    k <- kde2d(x, y,n=50)

    clo=""
    rgb.palette <- colorRampPalette(c("white", "blue",
"red"),space = "rgb")

    clo=rgb.palette(12)

    a=seq(valmin,valmax,(valmax-valmin)/12)

    filled.contour(k, col= clo,levels = a ,
zlim=range(valmin,valmax),asp = 1,plot.title=title(main = temp,
xlab = expression(paste(italic(x),"(",symbol(m),"m)")), ylab =
expression(paste(italic(y),"(",symbol(m),"m)")) ) )

    dev.off()

  }
```

**CODE 1 (Cell adhesion analysis):**



```
rename("Original");  
run("8-bit");  
run("Subtract Background...", "rolling=20 light stack");  
run("Set Scale...", "distance=1000 known=110 unit=um");  
setAutoThreshold("Default");  
setOption("BlackBackground", false);  
run("Convert to Mask", "method=Default background=Light calculate");  
run("Analyze Particles...", "size=1-Infinity show=Outlines display  
exclude clear summarize stack");
```

**CODE 2 (Surface coverage):**

```
run("8-bit");  
run("Invert""stack");  
run("Subtract Background..." "rolling=10 light stack");  
run("Color Balance...");  
setAutoThreshold("Default dark");  
run("Threshold...");  
call("ij.plugin.frame.ThresholdAdjuster.setMode" "Red");  
setAutoThreshold("Default");  
run("NaN Background" "stack");  
run("NaN Background" "stack");  
run("Set Measurements..." "area area_fraction limit redirect=None  
decimal=3");  
run("Analyze Particles..." "show=Outlines display exclude clear  
summarize stack");
```

**Table S1.** Shear rate and wall shear stress at the different flow rates tested (determined by Computational Fluid Dynamics) and examples of biomedical scenarios where these shear rates can be found. Adapted from Alves, et al. [2].

| Flow Rate<br>(mL/s) | Wall Shear Stress<br>( $\tau_w$ , Pa) | Shear Rate<br>( $\dot{\gamma}$ , 1/s) | Biomedical<br>Scenarios       |
|---------------------|---------------------------------------|---------------------------------------|-------------------------------|
| 1                   | 0.0052                                | 7.5                                   | Fluid flow in the oral cavity |
| 2                   | 0.0102                                | 15.0                                  | Urinary flow in a catheter    |
| 4                   | 0.0237                                | 33.7                                  | Flow in femoral artery        |
| 6                   | 0.0362                                | 51.6                                  | Blood flow in venous vessels  |
| 8                   | 0.0566                                | 80.3                                  | Flow in ascending aorta       |
| 10                  | 0.0719                                | 100.8                                 | Flow in ascending aorta       |

**References**

1. van Loenhout, M. T.; Kooij, E. S.; Wormeester, H.; Poelsema, B., Hydrodynamic flow induced anisotropy in colloid adsorption. *Colloids and surfaces A: Physicochemical and engineering aspects* **2009**, 342, (1-3), 46-52. doi: 10.1016/j.colsurfa.2009.03.058

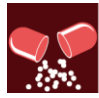

2. Alves, P.; Nir, S.; Reches, M.; Mergulhão, F., The effects of fluid composition and shear conditions on bacterial adhesion to an antifouling peptide-coated surface. *MRS Communications* **2018**, *8*, (3), 938-946. doi: 10.1557/mrc.2018.160
